# Supplementary material
Source: PubMed Central journal article supplement (PMC6746569)
Supplement: NIHMS1049177-supplement-1.pdf [file NIHMS1049177-supplement-1.pdf]

## Supplementary Data

---

### Low Vision Research Network (LOVRNET) Study Group:

**Association for the Blind and Visually Impaired**, Rochester, NY; Katherine White, O.D., Ray Gottlieb, O.D., Elizabeth Harvey, O.D., Paul Caito, O.D., Gwen Sterns, M.D.

**Casey Eye Institute, Oregon Health & Science University**, Portland, OR; John Boyer, O.D., Grace Tran, O.D.

**Center for Retina and Macular Disease**, Winter Haven, FL; Sonya Braudway, O.D., Alice Enault, O.T.R./L., C.L.V.T.

**Emory Eye Center**, Atlanta, GA; Susan Primo, O.D., Kenneth Rosengren, O.D., Thao Vu, O.D.

**Ensign Skills Center**, Fort Collins, CO; Mark DeGeorge, O.D., Cori Layton, S.C.L.V./O.T.R.

**Envision Vision Rehabilitation Center**, Wichita, KS; William Park, O.D., Karen Kendrick, O.T.R./L., Joanne Park, C.O.A., Danielle McIntyre

**The Frank Stein and Paul S. May Center for Low Vision Rehabilitation at California Pacific Medical Center, San Francisco**, CA; Donald Fletcher, M.D., Karen Myers, O.T.R./L.

**Indianapolis Eye Care Center, Indiana University School of Optometry**, Indianapolis, IN; Kevin Houston, O.D.

**The Jewish Guild for the Blind**, New York, NY; Laura Sperazza, O.D., Susan Weinstein, O.D.

**Jules Stein Eye Institute**, Los Angeles, CA; Melissa Chun, O.D., Jennie Kageyama, O.D., Connie Lam

**Low Vision Associates**, Bingham Farms, MI; Susan Gormezano, O.D.

**Massachusetts Eye and Ear, Harvard Department of Ophthalmology**, Boston, MA; MaryLou Jackson, M.D., Kim Schoessow, O.T.D., O.T.R./L.

**Medical College of Wisconsin**, Milwaukee, WI; Scott Robison, O.D.

**Modesto Optometric Vision Center**, Modesto, CA; Brian Elliott, O.D.

**Retina Consultants of Southwest Florida**, Fort Myers, FL; Donald Fletcher, M.D., Heather Holderfield, O.T.R./L.

**Richard E. Hoover Low Vision Rehabilitation Services, Greater Baltimore Medical Center**, Baltimore, MD; Janet S. Sunness, M.D., Susan Garber O.T.R./L., C.L.V.T.

**Richmond Eye & Ear Healthcare Alliance**, Richmond, VA; Jeffrey Michaels, O.D., Mary Bullock, O.T.R./L.

**Spectrios Institute for Low Vision**, Wheaton, IL; John Coalter, O.D., Connie Arends, M.S. Ed, C.V.R.T., Leah Gerlach, M.S., CRC, R. Tracy Williams, O.D.; Karen Thomas

**St. Luke's Cataract & Laser Institute**, Tarpon Springs, FL; Ed Huggett, O.D.

**Storm Eye Institute Low Vision Rehabilitation at the Medical University of South Carolina**, Charleston, SC; Stephen E. Morse, O.D., MPH, PhD., Kelly Singleton, M.S., O.D.

**The University of Iowa Department of Ophthalmology and Visual Sciences**, Iowa City, IA; Mark Wilkinson, O.D., Darcy Wolf, C.O.A.

**University of Michigan Kellogg Eye Center**, Ann Arbor, MI; Donna Wicker, O.D., Sherry Day, O.D., Karen Murphy, O.T.R.

**The University of Texas Health Science Center School at San Antonio, Lion's Low Vision Center of Texas**, San Antonio, TX Sandra Fox, O.D., Melva Perez, O.T.R./L.

**Vanderbilt Eye Institute**, Nashville, TN; K. Bradley Kehler, O.D.

**ViewFinder Low Vision Resource Center**, Mesa, AZ; Lynne Noon, O.D., Kevin Huff, O.D.

**Visionary Eye Center**, Reno, NV; Jason Bolenbaker, O.D.

**Washington University School of Medicine**, St. Louis, MO; Carrie Gaines, O.D., Monica Perlmutter, O.T.R./L.

**The Wilmer Eye Institute at Johns Hopkins School of Medicine**, Baltimore, MD; Judith Goldstein, O.D., Alexis Malkin, O.D., James Deremeik, CLVT, Katherine Cleveland, O.T.R./L., Amy Ocampo, Kim Soistman, Robert Massof, PhD., Carol Rainey, Cathy Epstein, Lynn Feuer, Lindsey Yang.
